1 **Context-independent scaling of neural responses to task difficulty in**  
2 **the multiple-demand network**

3 **Tanya Wen<sup>1\*</sup>, Tobias Egner<sup>1,2</sup>**

4 <sup>1</sup>Center for Cognitive Neuroscience, Duke University, Durham, NC, USA

5 <sup>2</sup>Department of Psychology and Neuroscience, Duke University, Durham, NC, USA

6  
7 **\* Corresponding author:** Tanya Wen, Center for Cognitive Neuroscience, Duke University,

8 LSRC, Box 90999, Durham, NC 27708, USA

9 email address: [tanya.wen@duke.edu](mailto:tanya.wen@duke.edu)

10

11 **Running title:** Context-independent scaling in the MD network

12

13 **Number of pages:** 42

14 **Number of figures:** 8

15 **Number of Tables:** 0

16 **Number of words:** Abstract = 191, Introduction = 881, Discussion = 1315

17

18 **Conflict of Interest:** The authors declare no competing financial interests.

19

20

## 1 **Abstract**

2 The multiple-demand (MD) network is sensitive to many aspects of cognitive demand, showing  
3 increased activation with more difficult tasks. However, it is currently unknown whether the MD  
4 network is modulated by the context in which task difficulty is experienced. Using fMRI, we  
5 examined MD network responses to low, medium, and high difficulty arithmetic problems within  
6 two cued contexts, an easy versus a hard set. The results showed that MD activity varied reliably  
7 with the absolute difficulty of a problem, independent of the context in which the problem was  
8 presented. Similarly, MD activity during task execution was independent of the difficulty of the  
9 previous trial. Representational similarity analysis further supported that representational distances  
10 in the MD network were consistent with a context-independent code. Finally, we identified several  
11 regions outside the MD network that showed context-dependent coding, including the precuneus,  
12 posterior cingulate cortex, precentral gyrus, and large areas of visual cortex. In sum, cognitive  
13 effort is processed by the MD network in a context-independent manner. We suggest that this  
14 absolute coding of cognitive demand in the MD network reflects the limited range of task difficulty  
15 that can be supported by the cognitive apparatus.

16

17 *Keywords: context; cognitive demand; effort; multiple-demand network; task difficulty*

18

19

20

1 The multiple-demand (MD) network is a set of frontal and parietal brain regions whose responses  
2 scale with cognitive demands, exhibiting enhanced activity with increasing cognitive load or  
3 difficulty across a diverse set of tasks (Duncan and Owen 2000; Duncan 2010; Fedorenko et al.  
4 2013; Duncan et al. 2020). To account for this broad association with cognitive demand, the MD  
5 network has been suggested to implement top down control to focus on the operations required for  
6 a current task, regardless of the precise nature of those operations (Erez and Duncan 2015; Jackson  
7 et al. 2017; Wen et al. 2020). However, as most previous studies were limited to a single  
8 experimental context in which difficulty was manipulated, a fundamental question about the  
9 relationship between MD network activity and cognitive effort remains unanswered: is MD  
10 network activity shaped by the context in which a given level of task difficulty is experienced?

11  
12 On one hand, context-dependent coding – sometimes referred to as “range adaptation” – is  
13 commonly observed in value-based decisions and perceptual processing (Nieuwenhuis et al. 2005;  
14 Elliott et al. 2008; Carandini and Heeger 2011; Cheadle et al. 2014; Cox and Kable 2014;  
15 Palminteri et al. 2015; Murai et al. 2016; Bavard et al. 2018, 2021; Hunter and Daw 2021). For  
16 example, Nieuwenhuis et al. (2005) created two contexts in which participants would either always  
17 win or always lose money. Within each context, there were also three possible outcomes, worst  
18 (+0¢/-40¢), intermediate (+30¢/-20¢), and best (+60¢/-0¢). The authors found that activity in  
19 reward-sensitive areas scaled positively with outcome value (best > intermediate > worst) in each  
20 context, but that activity levels for the three outcomes were comparable between contexts, despite  
21 the large difference in the objective value of these outcomes. In other words, neural reward coding  
22 appears to be relative, such that an equivalent absolute value will elicit a greater response if it is a  
23 relatively good than if it is a relatively bad outcome in the current context. Recent studies have

1 identified overlapping regions involved in cognitive effort and the anticipation and processing of  
2 reward in the MD network, especially in the anterior cingulate cortex (ACC; Chong et al., 2017;  
3 Croxson, Walton, O'Reilly, Behrens, & Rushworth, 2009; Shashidhara, Mitchell, Erez, & Duncan,  
4 2019; Vassena et al., 2014). In line with studies suggesting a close relationship between effort and  
5 reward of cognitive actions (Kool et al. 2010; Otto and Vassena 2021), it is therefore plausible that  
6 MD activity in response to difficulty could also dynamically adapt according to the range of  
7 difficulty levels within a given task context.

8

9 On the other hand, while humans can easily represent near-unlimited bounds of value (i.e., \$0.01,  
10 \$10, \$10000, etc.), and this large range may promote contextual adaptation in terms of neural  
11 coding, the range of difficulty of information processing we can handle seems to be rather limited  
12 (Marois & Ivanoff, 2005). Capacity limits in cognitive processing include the number of items we  
13 can attend to (Chun & Marois, 2002) and hold in working memory (e.g., Miller, 1956), processing  
14 bottlenecks that hinder parallel task execution (Pashler, 1994), and the speed with which  
15 information can be encoded into working memory (Dux & Marois, 2009; Zivoni & Lamy, 2022).  
16 Various authors have linked these capacity limitations to the MD network (Marois and Ivanoff  
17 2005; Watanabe and Funahashi 2014; Duncan et al. 2020) and, corresponding to the limited range  
18 of cognitive processing, the MD network's capacity to adapt its response to a wide range of  
19 difficulty levels may also be limited. Specifically, several studies have found that, rather than  
20 showing a monotonic increase with task difficulty, MD activity displayed an inverted U-shape  
21 response (Callicott et al. 1999; Linden et al. 2003) or a plateau after a certain difficulty level (Todd  
22 and Marois 2004; Marois and Ivanoff 2005; Mitchell and Cusack 2008), especially when  
23 performance improvement becomes impossible even with maximal attention. Thus, activity in the

1 MD network may reflect the investment of attentional resources, rather than objective or even  
2 subjective difficulty per se (Han and Marois 2013; Wen et al. 2018). If MD activity reflects  
3 resource investment, then this activity should increase whenever demand increases, but it should  
4 be unaltered by the difficulty of other tasks within its shared context.

5  
6 The current experiment was designed to tease apart these two possibilities by creating two  
7 difficulty contexts (easy and hard). Within each context we manipulated difficulty over three levels  
8 (low, medium, high) with basic arithmetic problems. Crucially, the highest difficulty level within  
9 the easy context was matched with the lowest level in the hard context. If MD activity were  
10 context-dependent, we would expect the MD network to adapt its range of activation according to  
11 relative task difficulty within each context. Accordingly, the MD network would show a different  
12 neural response to the matched difficulty conditions across contexts, with greater activity for the  
13 high difficulty level in the easy context than for the low difficulty level in the hard context. As  
14 another test of context-dependence, we examined whether MD activity during a given trial is  
15 sensitive to the difficulty level of the previous trial. Complementing these univariate analyses, we  
16 explored representational distances of difficulty in the MD network with RSA. Finally, a whole-  
17 brain analyses was conducted to identify additional regions that may differentially represent  
18 context-dependent and context-independent responses (Grabenhorst and Rolls 2009) to difficulty.

19

20

## 21 **Materials and Methods**

22 *Participants*

1 25 participants (9 males, 16 females; ages 18-35, mean = 25.01, SD = 4.11) were included in the  
2 experiment. Two additional participants were excluded due to low accuracy and excessive motion  
3 during the scans (mean accuracy < 70% and/or motion > 4 mm on one or more runs). All  
4 participants were neurologically healthy with normal or corrected-to-normal vision. Procedures  
5 were conducted in accordance with ethical approval obtained from the Duke University Health  
6 System Institutional Review Committee, and participants provided written, informed consent  
7 before the start of the experiment.

8

### 9 *Stimuli and task procedures*

10 The experimental design was modeled closely on Nieuwenhuis et al. (2005), but instead of reward,  
11 we manipulated task difficulty. The study consisted of an online practice session and a main  
12 experimental session in the scanner. The practice session was performed on participants' own  
13 computers within a week before the main experiment. During both sessions, participants were told  
14 that on each trial, they would be shown three doors from either a blue set or red set. They were  
15 informed that (a) one set of doors contains more difficult problems than the other set and (b) within  
16 each set of doors, there would be three levels of difficulty (low, medium, and high), and each door  
17 is associated with one level of difficulty. Thus, the two sets of doors defined the two difficulty  
18 contexts in the experiment. Additionally, participants were told that before the beginning of each  
19 trial, the position of the doors within the presented set would be shuffled, and they were given an  
20 animation demo of the doors being shuffled during the instructions to incentivize participants to  
21 choose different locations. Behind the "easy" set of doors, the math problems could be addition of  
22 (1: low difficulty) two single digits, with the constraint of the sum not exceeding 10 (e.g., 3 + 1),  
23 (2: medium difficulty) a single digit and a double digit, with the ones position requiring a carryover

1 (e.g.,  $94 + 8$ ), or (3: high difficulty) two double digits, with at least one carryover (e.g.,  $26 + 57$ ).  
2 Behind the “hard” set of doors, the math problems could be (1: low difficulty) two double digits  
3 (e.g.,  $19 + 42$ ), (2: medium difficulty) a double digit and a triple digit (e.g.,  $925 + 86$ ), or (3: high  
4 difficulty) two triple digits (e.g.,  $718 + 503$ ), all requiring at least one carryover. Thus, the high  
5 difficulty condition in the easy set was equivalent to the low difficulty condition in the hard set.  
6 The assignment of the red and blue doors to easy versus difficult sets was counterbalanced across  
7 participants.

8  
9 Figure 1 illustrates the structure of the experimental paradigm. On each trial, participants were  
10 first shown three doors from one set (i.e., the contextual cue) on the screen and had up to 2.5 s to  
11 press one out of three buttons (the “8”, “9”, and “0” keys on their keyboard during the online  
12 practice and the first three buttons of the right-hand button box in the scanner) to select the left,  
13 center, or right door. Participants were encouraged to respond to every trial, however, if the  
14 participant did not respond within the time limit, the computer would choose a door for them. As  
15 soon as a door was chosen, the word “Chosen!” would be displayed along with arrows indicating  
16 the selected door for the remainder of the 2.5 s and an additional 1 s. This was then followed by a  
17 1.5 s fixation cross. Next, participants were presented with a screen displaying a math problem in  
18 the center with three choices below. They were given up to 6 s to select the correct answer, using  
19 the same three buttons. After an answer was chosen, participants would be shown a fixation cross  
20 for the remainder of the duration and an additional 3 s before moving on to the next trial.

21  
22 The timing of the displays was the same for the online practice and the scanning sessions, except  
23 for that in the practice session, participants were additionally given feedback after each answer to

1 a math problem (either “Too slow! Press the spacebar to continue”, or “correct” or “incorrect” for  
2 500 ms). To promote learning of the associations between the colored doors and difficulty context  
3 during the online practice session, we used a blocked design (Flesch et al., 2018), where  
4 participants were given the same set of doors for 9 consecutive trials in alternating blocks.  
5 Participants performed a total of 54 practice trials in total and experienced each set of doors and  
6 difficulty level both equal number of times.

7

8 In the main experiment, participants performed 5 scanning runs. Each run had a total of 37 trials,  
9 with the first trial being a dummy trial. The two possible sets of doors and the six possible difficulty  
10 conditions (five levels) were varied on a trial-to-trial basis and occurred equally often across the  
11 experiment. The probability of switching from one condition to any other was equated, such that  
12 all possible transitions occurred equally often across the experiment. Although participants were  
13 told that different doors led to different math problems, in reality, the order of difficulty conditions  
14 was pre-determined and the sequence of difficulty conditions was unaffected by their response  
15 choices. Participants were not given feedback after each trial, but were shown an overall accuracy  
16 score after the end of each run.

17



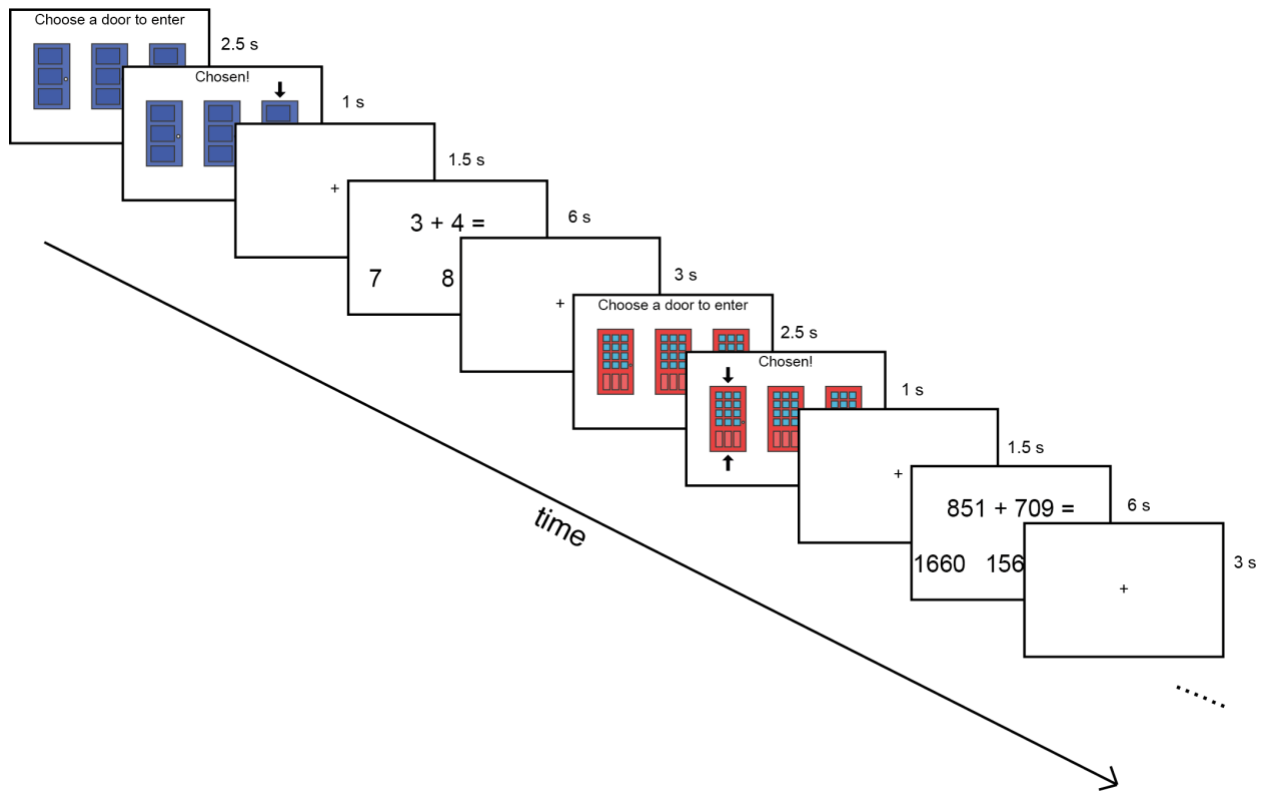

1

2 *Figure 1. Illustration of experimental paradigm, showing two trials. On each trial, participants*  
3 *were given a contextual cue in the form of a set of three colored doors (blue or red, associated*  
4 *with easy or hard problems, counterbalanced across participants), and were asked to choose one*  
5 *door to enter. After selecting a door, they were given a math problem from one of the three*  
6 *difficulty levels associated with that colored set and were asked to select the correct answer among*  
7 *three choices. See text for the timing of each display.*

8

9 *fMRI data acquisition*

10 Scanning took place in a 3T Siemens Prisma scanner at the Center for Advanced Magnetic  
11 Resonance Development at Duke University Hospital. Functional images were acquired using a  
12 multiband gradient-echo echoplanar imaging (EPI) pulse sequence (TR = 2000 ms, TE = 30 ms,  
13 flip angle = 90°, 128 × 128 matrices, slice thickness = 2 mm, no gap, voxel size 2 × 2 × 2 mm, 69

1 axial slices covering the entire brain, three slices acquired at once). The first five volumes served  
2 as dummy scans and were discarded to avoid T1 equilibrium effects. A reverse phase encoding  
3 image was collected at the end of the experiment. High-resolution anatomical T1-weighted images  
4 were acquired for each participant using a 3D MPRAGE sequence (192 axial slices, TR = 2250  
5 ms, TI = 900 ms, TE = 3.12 ms, flip angle = 9°, field of view = 256 × 256 mm, 1-mm isotropic  
6 resolution).

7

### 8 *Preprocessing*

9 Preprocessing was performed using fMRIPrep 20.2.3 (Esteban et al., 2018; RRID:SCR\_016216),  
10 which is based on Nipype 1.6.1 (Gorgolewski et al., 2011; RRID:SCR\_002502).

11

### 12 Anatomical data preprocessing

13 The T1-weighted (T1w) image was corrected for intensity non-uniformity (INU) with  
14 N4BiasFieldCorrection (Tustison et al. 2010), distributed with ANTs 2.3.3 (Avants, Epstein,  
15 Grossman, & Gee, 2008; RRID:SCR\_004757), and used as T1w-reference throughout the  
16 workflow. The T1w-reference was then skull-stripped with a Nipype implementation of the  
17 antsBrainExtraction.sh workflow (from ANTs), using OASIS30ANTs as target template. Brain  
18 tissue segmentation of cerebrospinal fluid (CSF), white-matter (WM) and gray-matter (GM) was  
19 performed on the brain-extracted T1w using fast (FSL 5.0.9, RRID:SCR\_002823; Zhang, Brady,  
20 & Smith, 2001). Brain surfaces were reconstructed using recon-all (FreeSurfer 6.0.1,  
21 RRID:SCR\_001847; Dale, Fischl, & Sereno, 1999), and the brain mask estimated previously was  
22 refined with a custom variation of the method to reconcile ANTs-derived and FreeSurfer-derived  
23 segmentations of the cortical gray-matter of Mindboggle (RRID:SCR\_002438; Klein et al., 2017).

1 Volume-based spatial normalization to one standard space (MNI152NLin2009cAsym) was  
2 performed through nonlinear registration with antsRegistration (ANTs 2.3.3), using brain-  
3 extracted versions of both T1w reference and the T1w template. The following template was  
4 selected for spatial normalization: ICBM 152 Nonlinear Asymmetrical template version 2009c  
5 (Fonov, Evans, McKinstry, Almlil, & Collins, 2009; RRID:SCR\_008796; TemplateFlow ID:  
6 MNI152NLin2009cAsym).

7

### 8 Functional data preprocessing

9 For each of the 5 BOLD runs per subject, the following preprocessing was performed. First, a  
10 reference volume and its skull-stripped version were generated using a custom methodology of  
11 fMRIPrep. A B0-nonuniformity map (or fieldmap) was estimated based on two (or more) echo-  
12 planar imaging (EPI) references with opposing phase-encoding directions, with 3dQwarp (R. W.  
13 Cox & Hyde, 1997; AFNI 20160207). Based on the estimated susceptibility distortion, a corrected  
14 EPI (echo-planar imaging) reference was calculated for a more accurate co-registration with the  
15 anatomical reference. The BOLD reference was then co-registered to the T1w reference using  
16 bbregister (FreeSurfer) which implements boundary-based registration (Greve and Fischl 2009).  
17 Co-registration was configured with six degrees of freedom. Head-motion parameters with respect  
18 to the BOLD reference (transformation matrices, and six corresponding rotation and translation  
19 parameters) are estimated before any spatiotemporal filtering using mcflirt (FSL 5.0.9; Jenkinson,  
20 Bannister, Brady, & Smith, 2002). BOLD runs were slice-time corrected using 3dTshift from  
21 AFNI 20160207 (R. W. Cox & Hyde, 1997; RRID:SCR\_005927). The BOLD time-series were  
22 resampled into standard space, generating a preprocessed BOLD run in MNI152NLin2009cAsym  
23 space. All resamplings were performed with a single interpolation step by composing all the

1 pertinent transformations (i.e. head-motion transform matrices, susceptibility distortion correction,  
2 and co-registrations to anatomical and output spaces). Gridded (volumetric) resamplings were  
3 performed using `antsApplyTransforms` (ANTs), configured with Lanczos interpolation to  
4 minimize the smoothing effects of other kernels (Lanczos 1964).

5

6 Prior to fMRI analyses, we removed the first 5 TRs in each run. The functional data were high-  
7 pass filtered with a cutoff at 1/128 Hz. Spatial smoothing of 10 mm full width at half maximum  
8 (FWHM) was applied for the univariate whole-brain analysis, but not for the univariate region of  
9 interest (ROI) analysis or the representation similarity analysis (RSA). For all the analyses, we  
10 controlled the false discovery rate (FDR) to correct for multiple comparisons across ROIs as well  
11 as the whole brain.

12

### 13 *ROIs*

14 For the primary analysis, we focused on the MD network (see Figures 4, 6, and 7). The MD  
15 network was based on data from Fedorenko et al. (2013), selecting frontoparietal regions  
16 responsive to cognitive demands across seven diverse tasks ([http://imaging.mrc-](http://imaging.mrc-cbu.cam.ac.uk/imaging/MDsystem)  
17 [cbu.cam.ac.uk/imaging/MDsystem](http://imaging.mrc-cbu.cam.ac.uk/imaging/MDsystem)). MD component ROIs were separated as described in Mitchell  
18 et al. (2016), based on proximity to local maxima in the data of Fedorenko et al. (2013); and  
19 included three clusters along the anterior, middle, and posterior middle frontal gyrus (aMFG,  
20 mMFG, and pMFG), posterior-dorsal lateral frontal cortex (pdLFC) close to the frontal eye field  
21 in the superior precentral sulcus, and clusters in the inferior parietal sulcus (IPS), anterior insula  
22 (AI), and pre-supplementary motor area and adjacent anterior cingulate cortex (ACC). As MD

1 activation tends to be largely symmetrical, left and right hemisphere ROIs were combined to form  
2 bilateral ROIs.

3

#### 4 *Univariate activation across difficulty levels*

5 Statistical analyses were performed first at the individual level, using a general linear model  
6 (GLM). In our first GLM, we had a regressor for each type of math problem that was answered  
7 correctly (6 regressors: 2 contexts  $\times$  3 difficulty levels). Math problems that were answered  
8 incorrectly were removed from the analysis using a separate regressor. All math problems were  
9 modeled with the duration of each trial's response time (or the maximum 6 s if participants failed  
10 to provide a response). We additionally had regressors for each set of contextual cues (i.e., blue  
11 and red doors; 2 regressors). The contextual cues were modeled with a fixed 3.5 s duration. Each  
12 regressor was convolved with the canonical hemodynamic response function. The six motion  
13 parameters and block means were included as regressors of no interest. The average beta estimates  
14 for individual participants were entered into a random effects group analysis.

15

16 One possibility is that the MD network shows context-independent activity (Figure 2Ai), such that  
17 MD activity would increase linearly with increased absolute difficulty of the math problems, and  
18 there would be an equivalent response to the two double digits additions (the high difficulty level  
19 in the easy set and the low difficulty level in the hard set), regardless whether it was experienced  
20 in the easy set or hard set. Another possibility is that the MD network shows context-dependent  
21 activity (Figure 2Aii), such that activation would be scaled within each set of doors. In this scenario,  
22 we would expect the low, medium, and high difficulty conditions to elicit similar neural responses  
23 across the two sets, such that the two double digits additions to show a greater neural response

1 when experienced in the easy set (in which it is the high difficulty condition) than when it is  
2 experienced in the hard set (in which it is the low difficulty condition). Finally, it is possible that  
3 the MD network is sensitive to both relative difficulty within a context as well as absolute difficulty  
4 that is independent of context, in which case we would expect MD activation to reflect an additive  
5 mix of the former two (Figure 2Aiii). To evaluate these possibilities, for each participant, we fit a  
6 linear regression with a regressor modeling absolute difficulty ([1,2,3,3,4,5]) and a regressor  
7 modeling relative difficulty ([1,3,5,1,3,5]) to their neural response to the six types of math  
8 problems. The individual participants' beta estimates were then entered into a random effects  
9 group analysis.

10

#### 11 *Univariate activation when switching difficulty levels*

12 In our second GLM, we modeled each imperative trial according to its current as well as previous  
13 difficulty context (i.e., Easy-Easy, Hard-Easy, Hard-Hard, Easy-Hard; 4 regressors). Each trial  
14 duration was modeled according to participants' response times. We also modeled the contextual  
15 cues according to their current and previous condition (i.e., Easy-Easy, Hard-Easy, Hard-Hard,  
16 Easy-Hard; 4 regressors). The context cues were modeled with a fixed 3.5 s duration. Math  
17 problems that were answered incorrectly were removed from the analysis using a separate  
18 regressor. The first imperative trial and first cue (which did not have a previous trial to switch  
19 from) was modeled individually as a regressor of no interest (2 regressors). Each regressor was  
20 convolved with the canonical hemodynamic response function. The six motion parameters and  
21 block means were included as regressors of no interest. The average beta estimates for individual  
22 participants were entered into a random effects group analysis.

23

1 A priori, we were particularly interested in the following contrasts: (1) switching from a problem  
2 in the hard set to a problem in the easy set versus repeating a problem in the easy set, and (2)  
3 switching from the easy set to a problem in the hard set versus repeating a problem in the hard set.  
4 One demonstration of context-dependent coding would be sensitivity to previous trial experience  
5 (Akitsuki et al. 2003; Nakahara et al. 2004). We hypothesized that if a participant becomes more  
6 efficient at solving hard problems because of a previous experience with a hard trial, then we  
7 would expect decreased MD activity when switching from the hard set to the easy set (Garavan et  
8 al. 2000; Landau et al. 2004). On the other hand, we may expect increased MD activity when  
9 switching from the easy set to the hard set, as relative task difficulty would increase (Botvinick et  
10 al. 1999; Carter et al. 2000; Durston et al. 2003; Kerns et al. 2004). Thus, we would expect an  
11 interaction between switching versus repeating a set, and whether the current set is easy or hard.

12

### 13 *RSA analysis*

14 We performed RSA using the linear discriminant contrast (LDC) to quantify dissimilarities  
15 between activation patterns. The analysis used the RSA toolbox (Nili et al., 2014), in conjunction  
16 with in-house software. The LDC was chosen because it is multivariate noise-normalized,  
17 potentially increasing sensitivity, and is a cross-validated measure which is distributed around zero  
18 when the true distance is zero (Walther et al., 2016). An average activity pattern for each type of  
19 math problem was obtained from the first GLM above, thus resulting in 6 patterns in total for each  
20 run. For every possible combination of two runs, and for each pair of patterns, the patterns from  
21 run 1 were projected onto a Fisher discriminant fitted for run 2, with the difference between the  
22 projected patterns providing a cross-validated estimate of a squared Mahalanobis distance. This  
23 was repeated projecting run 2 onto run 1, and we took the average as the dissimilarity measure

1 between the two patterns. We then averaged the result from each pair of runs. All pairs of pattern  
2 dissimilarities therefore formed a symmetrical representational dissimilarity matrix (RDM) with  
3 zeros on the diagonal. This was done individually on the MD ROIs as well as in a whole-brain  
4 analysis using a 10 mm searchlight and then smoothed with a 10 mm FWHM before the group  
5 analysis.

6  
7 We constructed two model RDMs to probe for the existence of absolute, context-independent  
8 difficulty coding and relative, context-dependent difficulty coding (Figure 2B). In each RDM, each  
9 cell represents the dissimilarity between the corresponding two types of math problems. In the  
10 context-independent coding RDM, dissimilarity increases as the difference in difficulty of the math  
11 problems increases (Figure 2Bi). In the context-dependent coding RDM, the low, medium, and  
12 high difficulty levels of each set are represented with the smallest dissimilarity, and dissimilarity  
13 increases accordingly to the distance between these three levels (Figure 2Bii). We note that the  
14 two model RDMs have little correlation with each other (Spearman's  $\rho = -0.04$ ,  $p = 0.90$ ).

15  
16 The RDMs generated from the brain data were then compared to the model RDMs using the  
17 Kendall's rank correlation coefficient  $\tau_A$ . As we did not want to assume a linear relationship  
18 between the dissimilarities, we used a rank-correlation method, and Kendall's  $\tau_A$  is ideally suited  
19 for models that predict tied ranks (Nili et al., 2014). t-tests were then performed to identify ROIs  
20 or regions that showed a significant correlation between the brain RDM and model RDMs.

21



## A. Model predictions for univariate activation

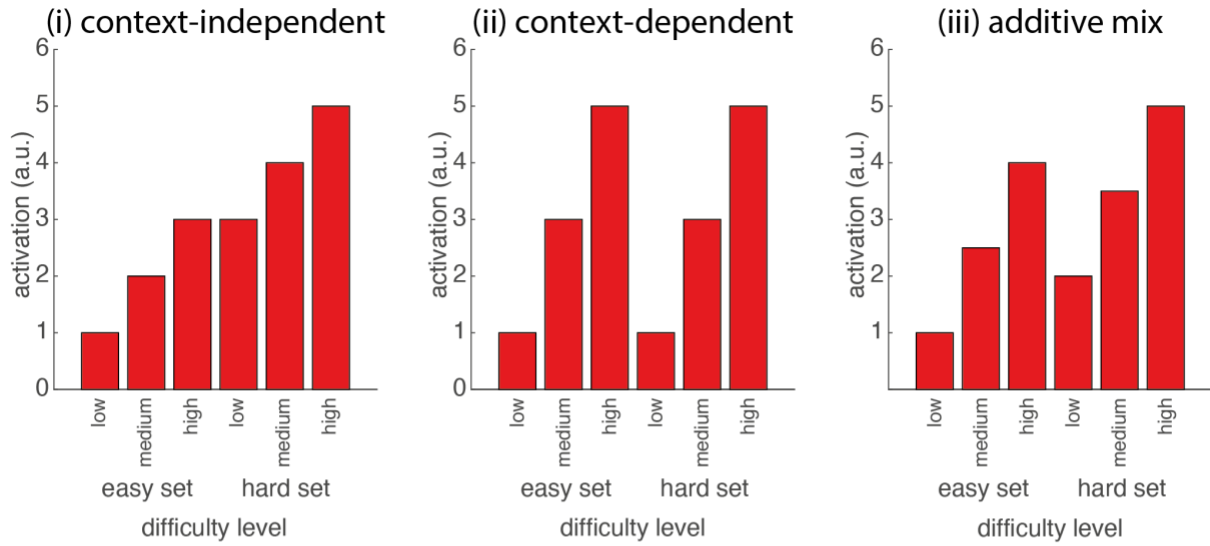

## B. Model RDMs

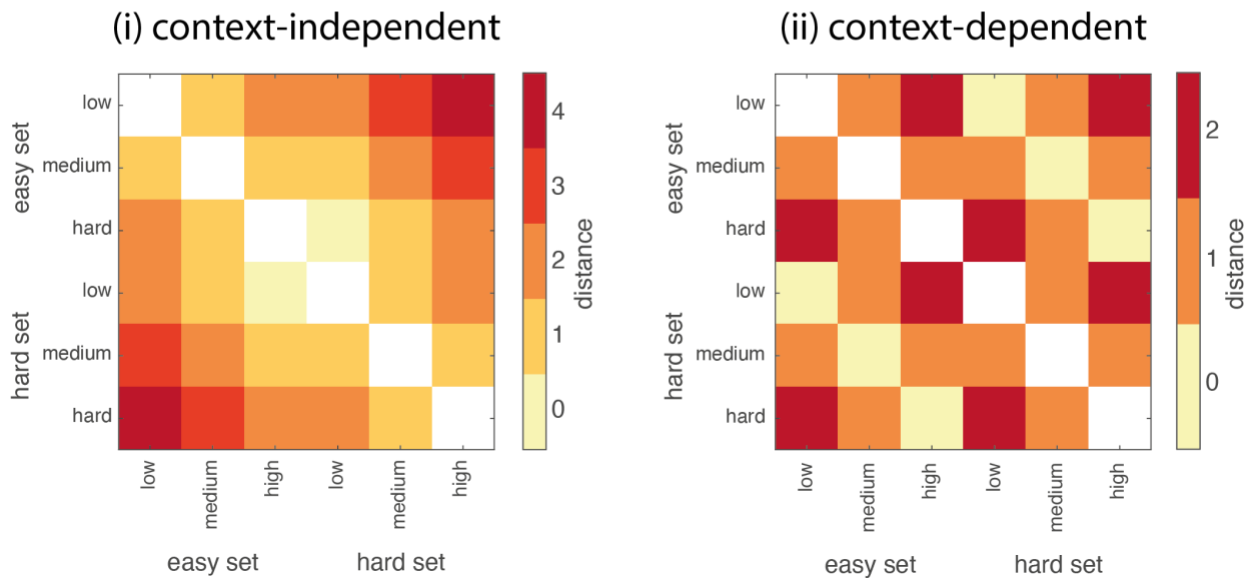

1

2 *Figure 2. Predictions of (A) univariate activations for regions that are (i) context-independent, (ii)*

3 *context-dependent, and (iii) an additive mix of the two; and (B) RDMs of (i) context-independent*

4 *and (ii) context-dependent coding in difficulty processing.*

5

## 1 *Data and code sharing*

2 All experimental stimuli and task/analysis codes are available at [https://github.com/tanya-](https://github.com/tanya-wen/Difficulty-MD-network)  
3 [wen/Difficulty-MD-network](https://github.com/tanya-wen/Difficulty-MD-network).

4

5

## 6 **Results**

### 7 *Behavioral results*

8 As shown in Figure 3A, accuracy decreased while reaction times increased with difficulty of the  
9 math problem. Overall, accuracy decreased from a mean of 98.84%, to a mean of 72.19% from  
10 the easiest (two single digits) to the hardest (two triple digits) difficulty level. Pairwise t-tests  
11 showed no differences between the two matched levels, that is, the high difficulty condition in the  
12 easy set and the low difficulty condition in the hard set ( $t = 0.36$ ,  $p = 0.72$ ). There were significant  
13 differences between all other trial types (all  $t$ s  $> 2.69$ , all  $p$ s  $< 0.02$ ; FDR corrected for multiple  
14 comparisons). Average median reaction time increased from 0.97 s in the easiest level to 4.12 s in  
15 the hardest level. Pairwise t-tests showed significant differences between all trial types, with the  
16 smallest difference occurring between the matched difficulty conditions where participants were  
17 slightly slower in responding to the low difficulty level in the hard set compared to the high  
18 difficulty level in the easy set (all  $t$ s  $> 2.64$ , all  $p$ s  $< 0.02$ ; FDR corrected for multiple comparisons).

19

20 We next examined whether there were any behavioral signatures of context-dependence based on  
21 previously experienced difficulty contexts. First, we grouped all trials according to whether they  
22 belonged to the hard or easy set, and which set preceded them. A two-way repeated measures  
23 ANOVA with factors of previous difficulty (easy vs. hard)  $\times$  current difficulty (easy vs. hard) was

1 performed on the accuracy data and median reaction time of correct trials, respectively (Figure  
2 3B). For accuracy, we found a significant main effect of current difficulty ( $F(1,24) = 91.68, p <$   
3  $0.001$ ), which is caused by the hard set having lower accuracy than the easy set. There was no  
4 main effect of previous difficulty ( $F(1,24) < 0.01, p = 0.97$ ) or previous difficulty  $\times$  current  
5 difficulty interaction ( $F(1,24) < 0.01, p = 0.96$ ). For reaction time, we found a significant main  
6 effect of current difficulty ( $F(1,24) = 1755.35, p < 0.001$ ), with longer reaction times for the hard  
7 set. There was no main effect of previous difficulty ( $F(1,24) = 0.29, p = 0.59$ ) and no previous  
8 difficulty  $\times$  current difficulty interaction ( $F(1,24) = 1.24, p = 0.28$ ). Thus, when analyzing sequence  
9 effects, we observed no context-dependence in accuracy or RT data.

## A. Responses to each difficulty condition

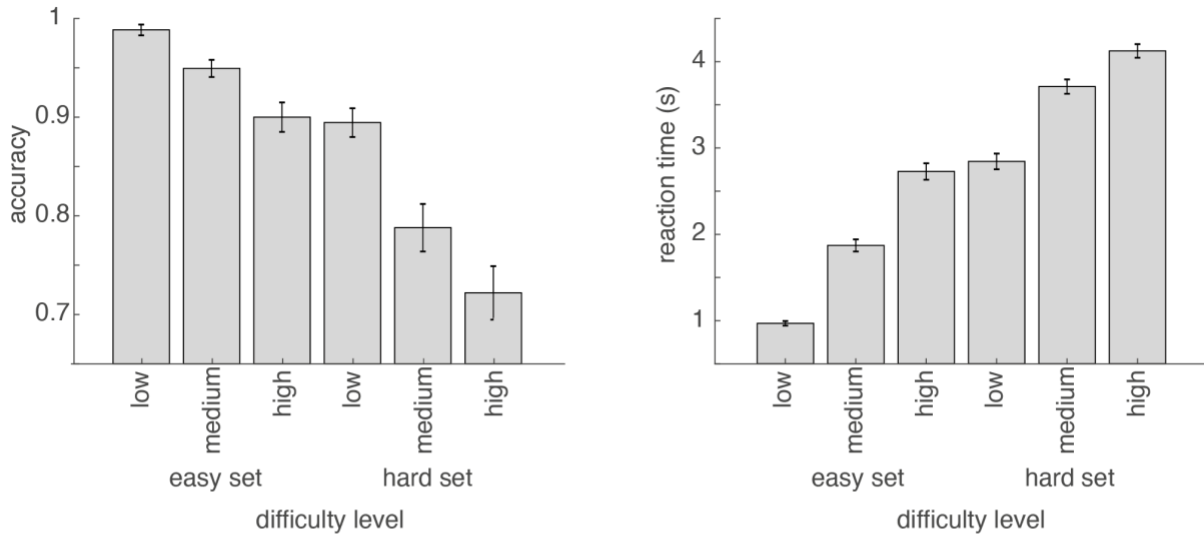

## B. Previous and current difficulty context

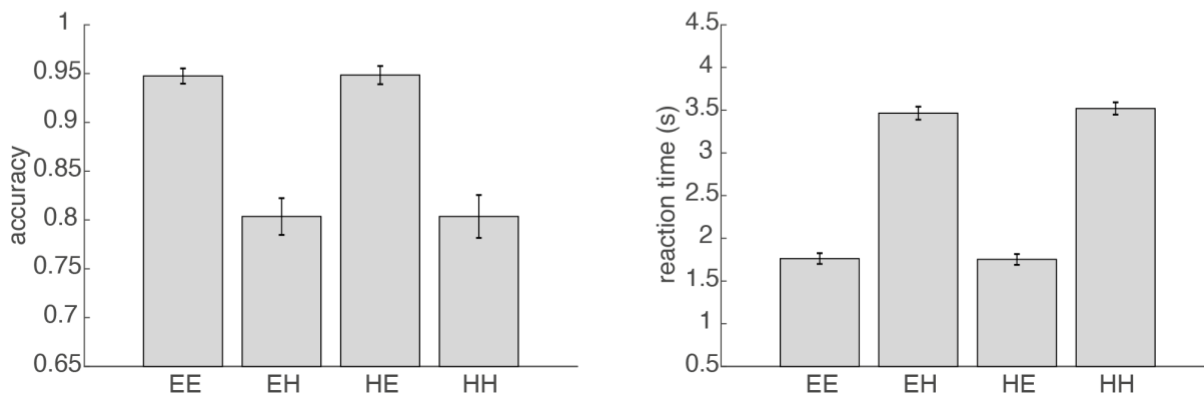

1  
2 *Figure 3. (A) Behavioral results of accuracy (left) and reaction time (right) across the six math*  
3 *conditions. (B) Accuracy (left) and reaction time (right) plotted as a function of the current context*  
4 *as well as the previously experienced context. EE: previous easy current easy; EH: previous easy*  
5 *current hard; HE: previous hard current easy; HH: previous hard current hard. Error bars*  
6 *represent standard error.*

7

8 *Univariate activation across difficulty conditions*

9 ROI analysis

1 Average beta estimates of each difficulty level from bilateral MD regions are shown in Figure 4.  
2 We also extracted the average activation for each of the six difficulty conditions from each  
3 participant using a combined MD network ROI. We first ran a context (easy vs. hard)  $\times$  difficulty  
4 level (low, medium, and high) repeated measures ANOVA to examine activity in the MD network.  
5 Results showed a significant main effect of context ( $F(1,24) = 21.47, p < 0.001$ ) and a significant  
6 main effect of difficulty level ( $F(2,48) = 9.89, p < 0.001$ ). There was also a context  $\times$  difficulty  
7 level interaction ( $F(2,48) = 4.10, p = 0.02$ ). Pairwise t-tests across the six difficulty conditions  
8 revealed several significant contrasts, with increased absolute difficulty associated with increased  
9 MD activation, although starting to plateau at the higher difficulty levels (no significant difference  
10 between the medium and high difficulty levels in the hard set ( $t = 0.20, p = 0.84$ )).

11  
12 To compare across difficulty levels and ROIs, we conducted a 3-way ANOVA with factors context  
13 (easy vs. hard), difficulty level (low, medium, and high), and ROI (7 MD ROIs). This analysis  
14 showed a significant main effect of context ( $F(1,24) = 15.31, p < 0.001$ ), a significant main effect  
15 of difficulty level ( $F(2,48) = 5.71, p < 0.01$ ), and a significant main effect of ROI ( $F(6,144) = 64.81,$   
16  $p < 0.001$ ). The main effect of context was driven by increased MD activity in the hard compared  
17 to easy context, and the main effect of difficulty was driven by increasing MD activity with higher  
18 difficulty levels. There was a context  $\times$  ROI interaction ( $F(6,144) = 7.20, p < 0.001$ ) and difficulty  
19 level  $\times$  ROI interaction ( $F(12,288) = 5.80, p < 0.001$ ), but no context  $\times$  difficulty level interaction  
20 ( $F(2,48) = 2.75, p = 0.07$ ). Finally, there was a context  $\times$  difficulty level  $\times$  ROI interaction  
21 ( $F(12,288) = 6.34$ ). Pairwise t-tests across the six difficulty conditions revealed that in most of the  
22 MD ROIs, there was a general increase and plateau in activation as difficulty increased, except for  
23 the aMFG and ACC, where the activation remained relatively similar across all six conditions.

1  
2  
3  
4  
5  
6  
7  
8  
9

Our key *a priori* hypothesis for a context-dependent system was that it would show a different neural response to the two double digit addition when experienced in the easy set than in the hard set. Crucially, we found no difference in the MD network ROI in response to these two conditions ( $t = 0.31$ ,  $p = .76$ ). Furthermore, none of the individual ROIs showed any significant differences between the matched difficulty conditions (all  $|t|s < 1.19$ , all  $ps > 0.98$ ; FDR corrected for multiple comparisons).

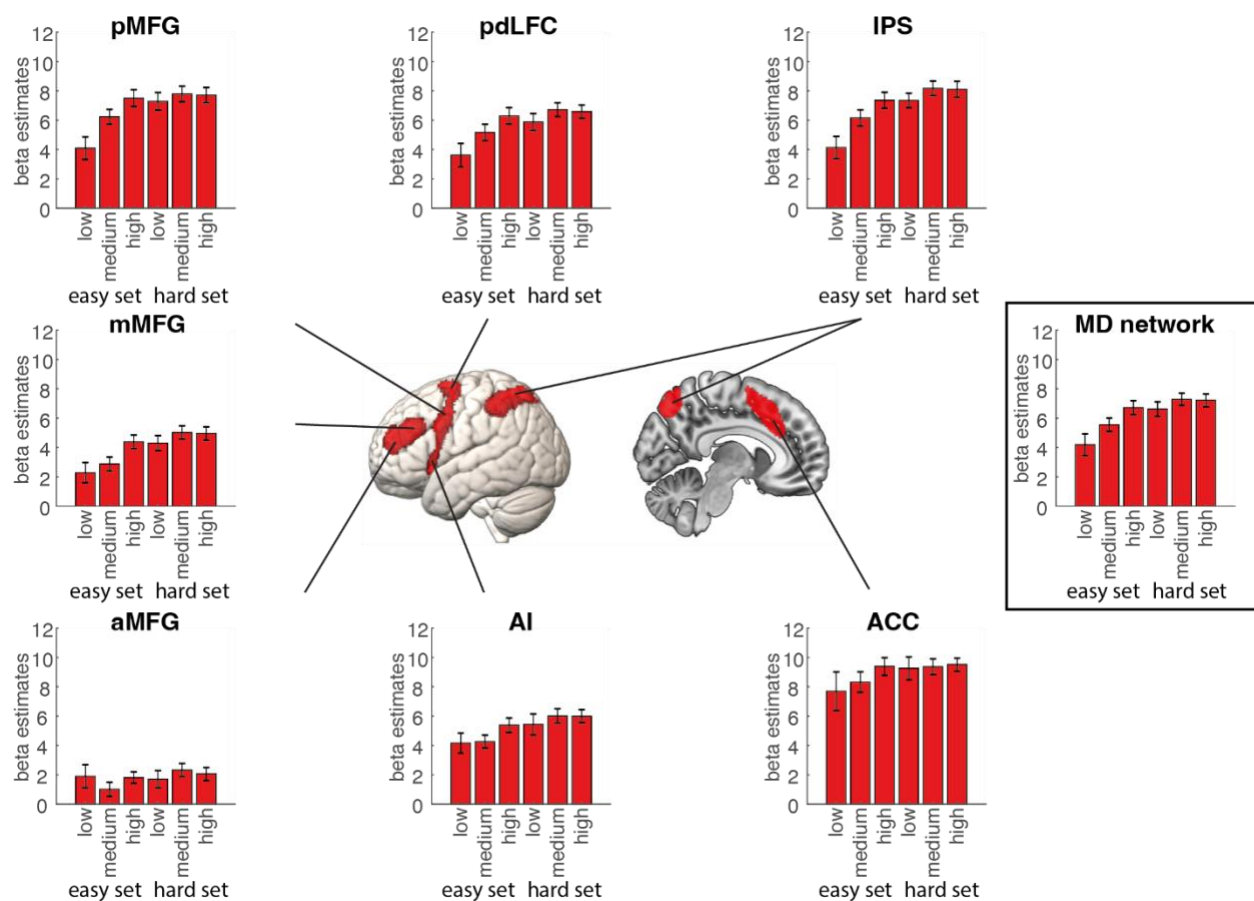

10

11 *Figure 4. ROI results of MD regions (left) as well as the entire MD network (right). Graphs show*  
12 *the beta values for each math condition. Error bars represent standard error.*

1

## 2 Whole-brain analysis

3 We also carried out a whole-brain analysis to examine other potential regions that may show  
4 context-independent or context-dependent activation. To do this, we fit a linear regression for the  
5 six difficulty conditions in each voxel with the regressors [1,2,3,3,4,5] and [1,2,3,1,2,3] (see  
6 Material and Methods). Results are shown in Figure 5. For the context-independent regressor, there  
7 was a significant positive association with activity throughout the MD network, largely  
8 overlapping with the ROIs, as well as in visual cortex. Significant negative association was found  
9 with activity in default mode network (DMN) regions, as these regions showed decreased  
10 activation as absolute difficulty increased. This observation is consistent with previous findings of  
11 the DMN showing decreased activity during externally oriented, cognitively demanding tasks  
12 (Raichle and Snyder 2007; Gilbert et al. 2012). There were no significant activity associations for  
13 the context-dependent regressor in either positive or negative direction.

14

15 As the matched difficulty conditions may be the most sensitive test for context-dependent effects,  
16 we also directly compared the high difficulty level in the easy set and the low difficulty level in  
17 the hard set, at the whole-brain level. No region showed significant differences between the two  
18 conditions at  $FDR < 0.05$  in either direction. Thus, we obtained evidence only for context-  
19 independent coding of difficulty.

20

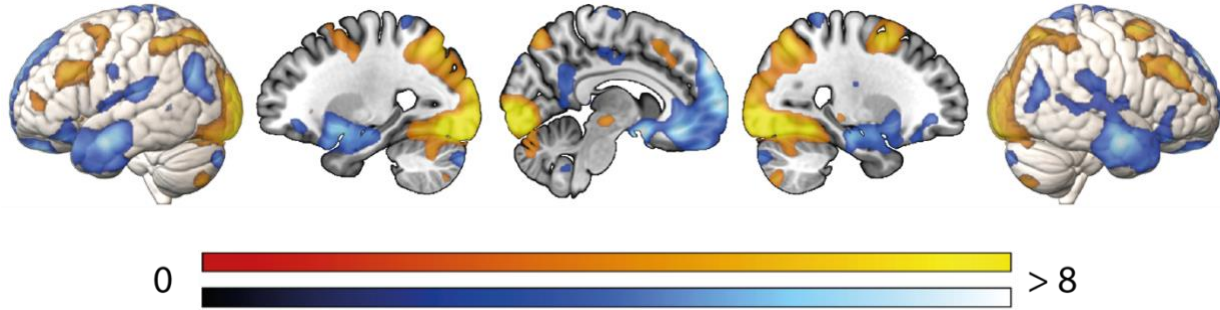

1  
2 *Figure 5. Whole-brain voxelwise regression showing significant associations to absolute, context-*  
3 *independent levels of difficulty. Colors indicate t values, with warm and cool scales indicating*  
4 *positive and negative tails, respectively. The activation maps are thresholded at FDR < 0.025 per*  
5 *tail.*

6  
7 *Univariate activation when switching difficulty contexts*

8 ROI analysis

9 Figure 6 shows the average MD response to the two sets of math problems as a function of the  
10 difficulty of the previous trial set during the processing of the math problem. We first performed  
11 a previous difficulty (easy vs. hard) × current difficulty (easy vs. hard) ANOVA on the combined  
12 MD ROI. To further examine differences between ROIs, we conducted a previous difficulty (easy  
13 vs. hard) × current (easy vs. hard) × ROI (7 MD ROIs) ANOVA.

14  
15 The MD network ROI showed a significant main effect of current difficulty ( $F(1,24) = 17.05, p <$   
16  $0.001$ ), which was a result of higher activation when performing math problems from the hard set.

17 There was no main effect of previous difficulty ( $F(1,24) = 0.51, p = 0.48$ ) or previous difficulty ×  
18 current difficulty interaction ( $F(1,24) = 0.47, p = 0.50$ ). In the ANOVA with the additional factor  
19 of ROI, we found a significant main effect of current difficulty ( $F(1,24) = 12.85, p = 0.001$ ) and  
20 significant a main effect of ROI ( $F(6,144) = 74.09, p < 0.001$ ), but no main effect of previous



1 difficulty ( $F(1,24) = 0.93, p = 0.35$ ). There was a current difficulty  $\times$  ROI interaction ( $F(6,144) =$   
2  $6.62, p < 0.001$ ), but no previous difficulty  $\times$  ROI ( $F(1,24) = 1.13, p = 0.35$ ), previous difficulty  $\times$   
3 current difficulty ( $F(6,144) = 0.35, p = 0.56$ ), or previous difficulty  $\times$  current difficulty  $\times$  ROI  
4 interaction ( $F(6,144) = 0.09, p > 0.99$ ). Separate previous difficulty  $\times$  current difficulty ANOVAs  
5 on each of the MD ROIs showed that similar to the previous GLM, all ROIs, except for the aMFG  
6 and ACC (both  $F_s(1,24) < 3.52, p > 0.07$ ) showed a main effect of difficulty (all  $F_s(1,24) > 6.79,$   
7 all  $p_s < 0.02$ ). The main effects of difficulty were driven by higher activation during execution of  
8 hard versus easy math problems.

9  
10 We additionally examined whether the MD network was sensitive to previous trial difficulty  
11 during the context cue, as presented in the Supplementary Material. Results showed some regions  
12 within the MD network, including the ACC, pdLFC, and pMFG displayed increased activation  
13 when the current context cue signaled an upcoming hard math problem. Moreover, the ACC and  
14 pdLFC may be sensitive to the previous difficulty context during the cue, as indicated by increased  
15 activation to the context cue if the previous trial came from the easy set (Figure S1).

16  
17 In summary, these results suggest that some regions within the MD network may be sensitive to  
18 difficulty context during cue processing; however, during task execution, the MD network is only  
19 sensitive to the current difficulty level, unaffected by the level of task difficulty on the previous  
20 trial.

21

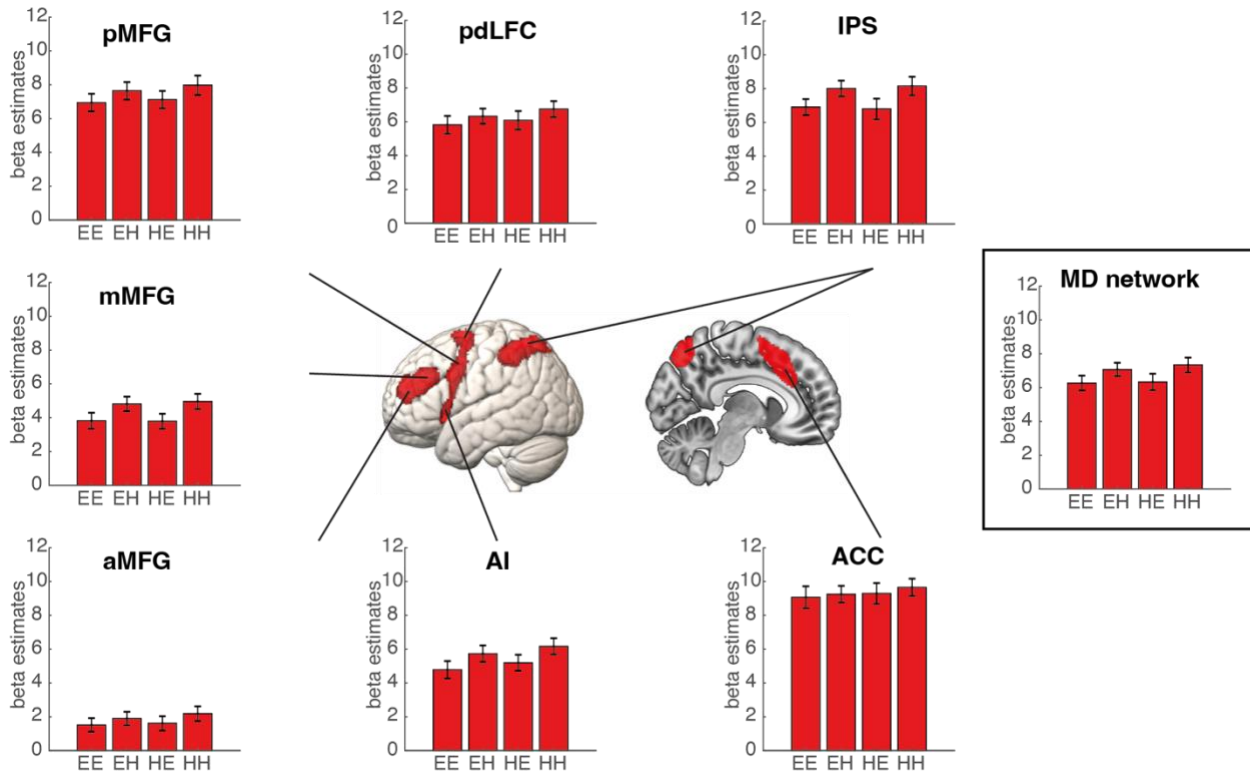

1

2 *Figure 6. Activity in the MD network during task execution based on previous and current trial*  
3 *difficulty. EE: previous easy current easy; EH: previous easy current hard; HE: previous hard*  
4 *current easy; HH: previous hard current hard. Error bars represent standard error.*

5

## 6 Whole-brain analysis

7 We examined responses including the main effect of previous difficulty, main effect of current  
8 difficulty, switching to an easy set versus repeating an easy set, and switching to a hard set versus  
9 repeating a hard set at the whole-brain level to examine possible effects outside of the MD network.

10 These contrasts correspond to the components of a previous difficulty (easy vs. hard) × current  
11 difficulty (easy vs. hard) ANOVA. Results from this whole-brain analysis are presented in Figure

12 S2.

13

1 During the math problem, no brain region was found to show a main effect of previous difficulty.  
2 There was significant activation throughout the MD network, as well as in the visual cortex, for  
3 hard versus easy problems. Significant activation was found in DMN for easy versus hard  
4 problems. No regions were identified when switching to an easy set versus repeating an easy set,  
5 nor its reverse contrast. Finally, no regions were identified when switching to a hard set versus  
6 repeating a hard set, although the thalamus and claustrum were more activated when repeating a  
7 hard set compared to switching from an easy to hard set.

8

9 Analyses performed during the contextual cue are also presented in the Supplementary Material  
10 (Figure S2).

11

12 In summary, we identified several regions both within and outside the MD network that show  
13 context-dependence during the context cue, such that previously experienced task difficulty  
14 influenced activation levels in these regions during the cue. However, no brain region showing  
15 context-dependence during task execution was identified. Instead, we found that the MD network  
16 was more active when solving math problems from the hard compared to easy set. These results  
17 suggest MD activity during task execution is context-independent.

18

19 *RSA results*

20 ROI analysis

21 We first performed RSA analysis on the MD ROIs. Results are shown in Figure 7. In all MD ROIs,  
22 the context-independent model RDM showed significant correlation with the brain RDMs (all ts  
23 > 5.10, all ps < 0.001) and provided a significantly better fit than the context-dependent model

- 1 RDM (all  $t_s > 3.92$ , all  $p_s < 0.001$ ), which did not show any significant correlation with the brain  
2 RDMs (all  $|t_s| < 1.45$ , all  $p_s < 0.56$ ). For the combined MD network ROI, the same pattern was  
3 observed. The context-independent model RDM showed significant correlation with the brain  
4 RDM ( $t = 22.51$ ,  $p < 0.001$ ) and had a significantly better fit than the context-dependent  
5 RDM ( $t = 15.08$ ,  $p < 0.001$ ), which was not significantly different from zero ( $t = -0.37$ ,  $p = 0.72$ ).  
6

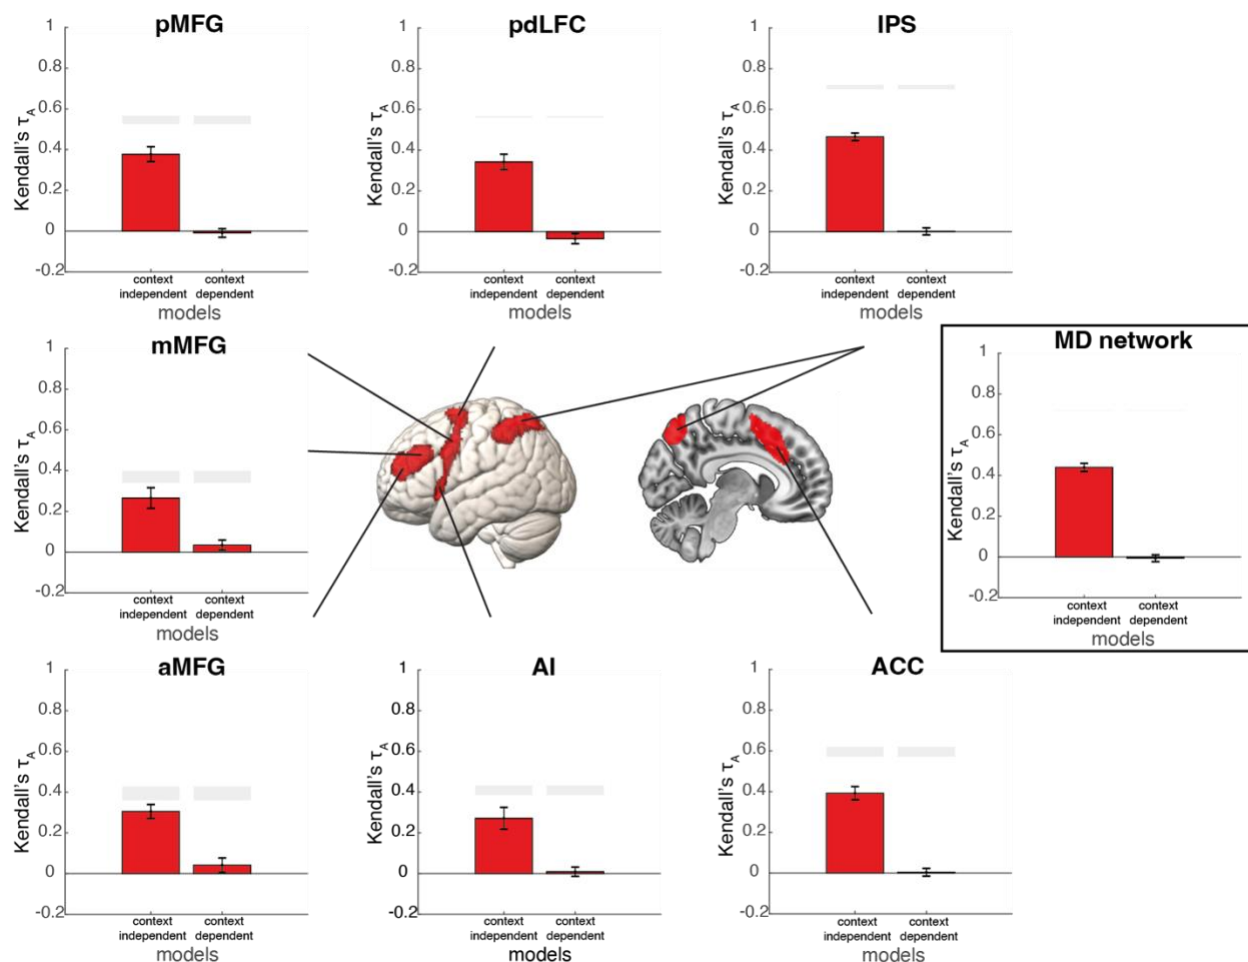

7  
8 *Figure 7. Relatedness of the model RDMs to the brain RDM for the MD ROIs (left) and the entire*  
9 *MD network (right). Kendall's  $\tau_A$  was used as the measure of RDM similarity. The gray patches*  
10 *are estimates of the noise ceiling. Error bars represent standard error.*

11

1 Whole-brain searchlight

2 To explore the effects of context-independent and context-dependent coding effects outside the a  
3 priori MD ROIs, we carried out an RSA searchlight analysis. Results are shown in Figure 8.  
4 Context-independent representation of difficulty was significant across most of the brain, although  
5 it was strongest in the visual cortex and local peaks in MD and DMN regions (Figure 8A). This  
6 aligns with our univariate results of strong context-independent activation in these regions. We  
7 note that the large swathes of activation may also partially be due to spatial smoothing from the  
8 10 mm searchlight. We observed several regions showing context-dependent coding, including the  
9 precuneus, posterior cingulate cortex, precentral gyrus, parts of the anterior cingulate cortex,  
10 posterior insula, and large areas of the visual cortex. While some of these regions are close to our  
11 MD ROIs, they have little overlap (Figure 8B). Since these regions are observed to be correlated  
12 with both RDM models (which are largely orthogonal), we suggest that they show sensitivity to  
13 both absolute difficulty as well as the contextual difficulty in which the task was presented.

14

## A. Context-independent

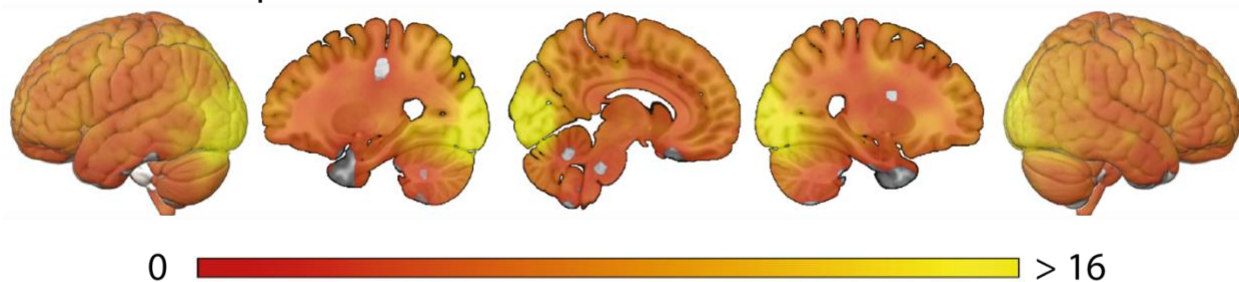

## B. Context-dependent

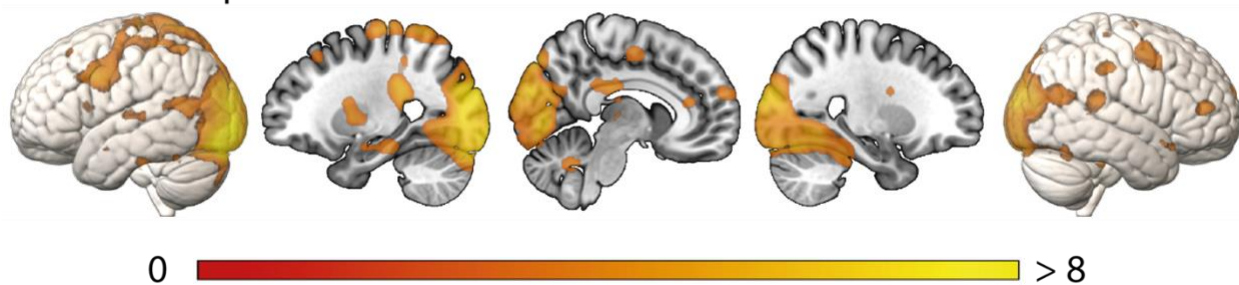

1

2 *Figure 8. (A) Context-independent and (B) context-dependent coding of difficulty across the whole*  
3 *brain, calculated using local spherical searchlights, and thresholded at  $FDR < 0.025$ .*

4

5

## 6 **Discussion**

7 The present study examined for the first time whether activity in the MD network is responsive to  
8 task difficulty in a context-dependent or context-independent manner. Univariate activations as  
9 well as RSA analysis suggested that the response of the MD network to difficulty is context-  
10 independent, such that activations increased with the absolute difficulty of the task and  
11 representational dissimilarity increased with the difference of difficulty between levels, rather than  
12 being re-scaled between contexts comprising easier or harder trials. Accordingly, identical  
13 difficulty levels across the two contexts elicited equivalent MD activity, even though they  
14 represented the highest difficulty level in the easy context and the lowest difficulty level in the

1 hard context. These results are inconsistent with context-dependent effects observed in value and  
2 sensory processing, but are consistent with the notion that strong MD activation during more  
3 difficult tasks reflects the increased demand in integrating the components of cognitive operations  
4 to solve the task at hand (Duncan 2013; Duncan et al. 2020).

5  
6 In everyday life, perceived difficulty may sometimes seem relative to previous experiences. For  
7 example, if one completes mock exam that is harder than the actual test, the test will feel easy; on  
8 the other hand, if one fails to adequately prepare, then the test would feel hard (Bjork et al. 2013;  
9 Carpenter et al. 2020). We found some effect of the previous trial on the current difficulty context  
10 during the cue presentation in the ACC and pdLFC of the MD network, as well as in the DMN.  
11 These results are consistent with previous studies on sequence effects in the ACC and regions in  
12 the prefrontal cortex in the conflict-control literature, where an incongruent trial following a  
13 congruent trial elicits more activation than repeating an incongruent trial (Botvinick et al. 1999;  
14 Carter et al. 2000; Durston et al. 2003; Kerns et al. 2004). Yet, during the actual execution of the  
15 task, none of the MD ROIs showed an effect of the previous context in the present study, which  
16 again suggests MD is not sensitive to relative difficulty.

17  
18 Why would brain activity related to cognitive demand be mostly context-independent when value-  
19 based and sensory processing commonly display range adaptation effects? One common  
20 explanation for context-dependent coding is that neural computation is costly and maximum firing  
21 rates are limited, so an efficient neural code should adapt to the range of possible values within the  
22 present context (Padoa-Schioppa 2009; Louie and Glimcher 2012; Cox and Kable 2014; Glimcher  
23 2014). This allows humans to represent and compare seemingly unlimited ranges of values, from

1 fractions to trillions, without much increase in effort or cost to performance. However, our capacity  
2 for high-level cognitive operations is inherently limited, and when cognitive processes become  
3 overloaded, there is degradation in performance (Norman and Bobrow 1975). In other words, in  
4 cognitive tasks, such as solving an arithmetic problem, performance is a function of the amount of  
5 cognitive resources available, and thus hits a natural limit (Kahneman 1973; Norman and Bobrow  
6 1975; Marois and Ivanoff 2005). As previous studies have shown, MD network activity may reflect  
7 the degree to which performance can be improved by increasing attentional investment (Han and  
8 Marois 2013; Wen et al. 2018). If this were the case, then MD activity should be context-  
9 independent, as other trials should not affect the number of cognitive processes required for any  
10 given trial. Another way of looking at this is that, unlike the vast range of possible rewards values  
11 or sensory stimulation, the range of cognitive processing demand that can be handled by the brain  
12 is so limited that contextual adaptation for range coverage is unnecessary.

13  
14 We note that our experiment is an event-related design, such that difficulty changed trial by trial.  
15 It therefore remains possible that MD activity might adapt to different difficulty ranges after longer  
16 exposure. Several studies have shown that task-related brain activity in MD regions may decrease  
17 after practice on a task (Garavan et al. 2000; Jansma et al. 2001; Milham et al. 2003; Landau et al.  
18 2004), presumably reflecting increased neural efficiency, with fewer neural resources required to  
19 achieve the same level of performance. Thus, future studies may test whether MD activity would  
20 be sensitive to context in a blocked design (Bavard et al. 2021) or with separate groups of subjects  
21 experiencing different ranges of difficulty levels. Having said that, it should be noted that the  
22 coding of reward outcomes in a near-identical event-related design was found to be context-  
23 dependent (Nieuwenhuis et al., 2005). We can therefore conclude that trial-by-trial changes in



1 context do not generally pre-empt context adaptation effects, and that the processing of task  
2 difficulty seems to fundamentally differ from the processing of reward outcomes.

3  
4 Using whole-brain analysis, we furthermore explored whether there were regions outside the MD  
5 network that may show context sensitivity to task difficulty. We did not find any regions that  
6 activated in accordance with the univariate predictions of a context-dependent model. However,  
7 our RSA searchlight uncovered several regions, most notably the precuneus, posterior cingulate  
8 cortex, precentral gyrus, and large areas of the visual cortex whose activity patterns were  
9 associated with context-dependent coding. It has been proposed that the posterior parietal cortex  
10 encodes abstract relational information among stimuli and the structure of the environment  
11 (Summerfield et al. 2019). These results are in line with the notion that the brain is capable to  
12 matching relational knowledge of levels (low, medium, and high) across different contexts  
13 (Sheahan et al. 2021).

14  
15 Previous studies have shown that mental effort is costly and has negative utility (Kool and  
16 Botvinick 2018), and when given the choice, participants typically choose tasks or contexts with  
17 low compared to high cognitive demand (Kool et al. 2010). It would therefore seem plausible that  
18 some reward-sensitive (cost-sensitive) brain regions should track task difficulty or cognitive effort.  
19 Our univariate analysis found that MD network regions showed increased activation and DMN  
20 regions showed decreased activation as the absolute difficulty of the task increased, regardless of  
21 context. Meta-analyses of the valuation network have documented that it has substantial overlap  
22 with several regions in the MD and DMN networks, including the ACC and AI in the MD network,  
23 and vmPFC and PCC in the DMN network (Levy and Glimcher 2012; Bartra et al. 2013), so these

1 regions may have been involved in tracking effort cost in the current paradigm. However, it is  
2 difficult to evaluate where coding of effort costs is located in the brain without fully crossing  
3 reward and effort variables to decorrelate reward and difficulty (Westbrook et al. 2019). As our  
4 study did not manipulate reward, we cannot know with certainty the relationship between the two  
5 variables in the present data. For example, it is possible that correctly solving a hard problem could  
6 be more rewarding (e.g., less boring, a bigger accomplishment) than solving an easy problem (Wu  
7 et al. 2021).

8  
9 Context-dependent representation in the brain seem ubiquitous in many domains, including  
10 sensory processing (Carandini and Heeger 2011; Cheadle et al. 2014), temporal perception  
11 (Walker et al. 1981; Murai et al. 2016), reward (Cox and Kable 2014; Bavard et al. 2018), and  
12 value (Sheahan et al. 2021). However, our study showed that the response of the MD network to  
13 task difficulty may be an exception to the norm. While context-dependent coding can be useful to  
14 compare values within the currently relevant context, it often leads to irrational choices, such as  
15 picking a suboptimal option under certain manipulations (Kahneman and Tversky 1979; Tversky  
16 and Simonson 1993; Chung et al. 2017; Bavard et al. 2021). Absolute coding is important for  
17 consistent and rational choices (Lee et al. 2007; Padoa-Schioppa and Assad 2007; Grabenhorst  
18 and Rolls 2009). In one study, Chung et al. (2017) found that stronger functional connectivity  
19 between frontal and reward regions when participants successfully overrode the decoy effect and  
20 made unbiased choices. Accordingly, it is possible that context-dependent coding in some areas,  
21 such as sensory and reward regions, combined with context-independent coding in MD regions,  
22 together contribute to adaptive human behavior.

23

1

## 2 **Acknowledgements**

3 We thank Yuxi Candice Wang for assisting with fMRI data collection. This work was supported  
4 by the National Institute of Mental Health of the National Institute of Health (R01 MH116967-  
5 01A1 to T.E.).

6

7

## 8 **References**

- 9 Akitsuki Y, Sugiura M, Watanabe J, Yamashita K, Sassa Y, Awata S, Matsuoka H, Maeda Y,  
10 Matsue Y, Fukuda H, Kawashima R. 2003. Context-dependent cortical activation in  
11 response to financial reward and penalty: An event-related fMRI study. *Neuroimage*.  
12 19:1674–1685.
- 13 Avants BB, Epstein CL, Grossman M, Gee JC. 2008. Symmetric diffeomorphic image  
14 registration with cross-correlation: Evaluating automated labeling of elderly and  
15 neurodegenerative brain. *Med Image Anal*. 12:26–41.
- 16 Bartra O, McGuire JT, Kable JW. 2013. The valuation system: A coordinate-based meta-analysis  
17 of BOLD fMRI experiments examining neural correlates of subjective value. *Neuroimage*.  
18 76:412–427.
- 19 Bavard S, Lebreton M, Khamassi M, Coricelli G, Palminteri S. 2018. Reference-point centering  
20 and range-adaptation enhance human reinforcement learning at the cost of irrational  
21 preferences. *Nat Commun* 2018 91. 9:1–12.
- 22 Bavard S, Rustichini A, Palminteri S. 2021. Two sides of the same coin: Beneficial and  
23 detrimental consequences of range adaptation in human reinforcement learning. *Sci Adv*. 7.

- 1 Bjork RA, Dunlosky J, Kornell N. 2013. Self-regulated learning: Beliefs, techniques, and  
2 illusions. *Annu Rev Psychol*.
- 3 Botvinick M, Nystrom LE, Fissell K, Carter CS, Cohen JD. 1999. Conflict monitoring versus  
4 selection-for-action in anterior cingulate cortex. *Nat* 1999 4026758. 402:179–181.
- 5 Callicott JH, Mattay VS, Bertolino A, Finn K, Coppola R, Frank JA, Goldberg TE, Weinberger  
6 DR. 1999. Physiological characteristics of capacity constraints in working memory as  
7 revealed by functional MRI. *Cereb Cortex*. 9:20–26.
- 8 Carandini M, Heeger DJ. 2011. Normalization as a canonical neural computation. *Nat Rev*  
9 *Neurosci*. 13:51–62.
- 10 Carpenter SK, Endres T, Hui L. 2020. Students’ Use of Retrieval in Self-Regulated Learning:  
11 Implications for Monitoring and Regulating Effortful Learning Experiences. *Educ Psychol*  
12 *Rev*.
- 13 Carter CS, Macdonald AM, Botvinick M, Ross LL, Stenger VA, Noll D, Cohen JD. 2000.  
14 Parsing executive processes: strategic vs. evaluative functions of the anterior cingulate  
15 cortex. *Proc Natl Acad Sci U S A*. 97:1944–1948.
- 16 Cheadle S, Wyart V, Tsetsos K, Myers N, deGardelle V, Herculano-Houzel S, Summerfield C.  
17 2014. Adaptive Gain Control during Human Perceptual Choice. *Neuron*. 81:1429–1441.
- 18 Chong TTJ, Apps M, Giehl K, Sillence A, Grima LL, Husain M. 2017. Neurocomputational  
19 mechanisms underlying subjective valuation of effort costs. *PLOS Biol*. 15:e1002598.
- 20 Chun MM, Marois R. 2002. The dark side of visual attention Marvin M Chun \* and René  
21 Marois. *Curr Opin Neurobiol*. 12:184–189.
- 22 Chung HK, Sjöström T, Lee HJ, Lu YT, Tsuo FY, Chen TS, Chang CF, Juan CH, Kuo WJ,  
23 Huang CY. 2017. Why Do Irrelevant Alternatives Matter? An fMRI-TMS Study of

- 1 Context-Dependent Preferences. *J Neurosci.* 37:11647–11661.
- 2 Cox KM, Kable JW. 2014. BOLD Subjective Value Signals Exhibit Robust Range Adaptation. *J*  
3 *Neurosci.* 34:16533–16543.
- 4 Cox RW, Hyde JS. 1997. Software tools for analysis and visualization of fMRI data. *NMR*  
5 *Biomed.* 10:171–178.
- 6 Croxson PL, Walton ME, O’Reilly JX, Behrens TEJ, Rushworth MFS. 2009. Effort-Based Cost–  
7 Benefit Valuation and the Human Brain. *J Neurosci.* 29:4531–4541.
- 8 Dale AM, Fischl B, Sereno MI. 1999. Cortical Surface-Based Analysis: I. Segmentation and  
9 Surface Reconstruction. *Neuroimage.* 9:179–194.
- 10 Duncan J. 2010. The multiple-demand (MD) system of the primate brain: mental programs for  
11 intelligent behaviour. *Trends Cogn Sci.* 14:172–179.
- 12 Duncan J. 2013. The Structure of Cognition: Attentional Episodes in Mind and Brain. *Neuron.*  
13 80:35–50.
- 14 Duncan J, Assem M, Shashidhara S, Duncan J. 2020. Integrated Intelligence from Distributed  
15 Brain Activity Fluid Intelligence and Attentional Integration. *Trends Cogn Sci.* xx.
- 16 Duncan J, Owen AM. 2000. Common regions of the human frontal lobe recruited by diverse  
17 cognitive demands. *Trends Neurosci.* 23:475–483.
- 18 Durston S, Davidson MC, Thomas KM, Worden MS, Tottenham N, Martinez A, Watts R, Ulug  
19 AM, Casey BJ. 2003. Parametric manipulation of conflict and response competition using  
20 rapid mixed-trial event-related fMRI. *Neuroimage.* 20:2135–2141.
- 21 Elliott R, Agnew Z, Deakin JFW. 2008. Medial orbitofrontal cortex codes relative rather than  
22 absolute value of financial rewards in humans. *Eur J Neurosci.* 27:2213–2218.
- 23 Erez Y, Duncan J. 2015. Discrimination of Visual Categories Based on Behavioral Relevance in

- 1 Widespread Regions of Frontoparietal Cortex. *J Neurosci.* 35:12383–12393.
- 2 Esteban O, Markiewicz CJ, Blair RW, Moodie CA, Isik AI, Erramuzpe A, Kent JD, Goncalves  
3 M, DuPre E, Snyder M, Oya H, Ghosh SS, Wright J, Durnez J, Poldrack RA, Gorgolewski  
4 KJ. 2018. fMRIPrep: a robust preprocessing pipeline for functional MRI. *Nat Methods* 2018  
5 161. 16:111–116.
- 6 Fedorenko E, Duncan J, Kanwisher N. 2013. Broad domain generality in focal regions of frontal  
7 and parietal cortex. *Proc Natl Acad Sci.* 110:16616–16621.
- 8 Fonov V, Evans A, McKinstry R, Almlí C, Collins D. 2009. Unbiased nonlinear average age-  
9 appropriate brain templates from birth to adulthood. *Neuroimage.* 47:S102.
- 10 Garavan H, Kelley D, Rosen A, Rao SM, Stein EA. 2000. Practice-related functional activation  
11 changes in a working memory task. *Microsc Res Tech.* 51:54–63.
- 12 Gilbert SJ, Bird G, Frith CD, Burgess PW. 2012. Does “task difficulty” explain “task-induced  
13 deactivation?” *Front Psychol.* 3:125.
- 14 Glimcher P. 2014. Understanding the hows and whys of decision-making: From expected utility  
15 to divisive normalization. *Cold Spring Harb Symp Quant Biol.* 79:169–176.
- 16 Gorgolewski K, Burns CD, Madison C, Clark D, Halchenko YO, Waskom ML, Ghosh SS. 2011.  
17 Nipype: A flexible, lightweight and extensible neuroimaging data processing framework in  
18 Python. *Front Neuroinform.* 5:13.
- 19 Grabenhorst F, Rolls ET. 2009. Different representations of relative and absolute subjective  
20 value in the human brain. *Neuroimage.* 48:258–268.
- 21 Greve DN, Fischl B. 2009. Accurate and robust brain image alignment using boundary-based  
22 registration. *Neuroimage.* 48:63–72.
- 23 Han SW, Marois R. 2013. Dissociation between process-based and data-based limitations for

- 1 conscious perception in the human brain. *Neuroimage*. 64:399–406.
- 2 Hunter LE, Daw ND. 2021. Context-sensitive valuation and learning. *Curr Opin Behav Sci*.
- 3 Jackson J, Rich AN, Williams MA, Woolgar A. 2017. Feature-selective Attention in  
4 Frontoparietal Cortex: Multivoxel Codes Adjust to Prioritize Task-relevant Information. *J*  
5 *Cogn Neurosci*. 29:310–321.
- 6 Jansma JM, Ramsey NF, Slagter HA, Kahn RS. 2001. Functional anatomical correlates of  
7 controlled and automatic processing. *J Cogn Neurosci*. 13:730–743.
- 8 Jenkinson M, Bannister P, Brady M, Smith S. 2002. Improved Optimization for the Robust and  
9 Accurate Linear Registration and Motion Correction of Brain Images. *Neuroimage*. 17:825–  
10 841.
- 11 Kahneman D. 1973. *Attention and Effort*, Englewood Cliffs, NJ: Prentice-Hall,.
- 12 Kahneman D, Tversky A. 1979. Prospect theory: An analysis of decision under risk. In:  
13 *Econometrica*. p. 263–291.
- 14 Kerns JG, Cohen JD, MacDonald AW, Cho RY, Stenger VA, Carter CS. 2004. Anterior  
15 Cingulate Conflict Monitoring and Adjustments in Control. *Science (80- )*. 303:1023–1026.
- 16 Klein A, Ghosh SS, Bao FS, Giard J, Häme Y, Stavsky E, Lee N, Rossa B, Reuter M, Chaibub  
17 Neto E, Keshavan A. 2017. Mindboggling morphometry of human brains. *PLOS Comput*  
18 *Biol*. 13:e1005350.
- 19 Kool W, Botvinick M. 2018. Mental labour. *Nat Hum Behav*.
- 20 Kool W, McGuire JT, Rosen ZB, Botvinick MM. 2010. Decision Making and the Avoidance of  
21 Cognitive Demand. *J Exp Psychol Gen*. 139:665–682.
- 22 Lanczos C. 1964. Evaluation of Noisy Data. *J Soc Ind Appl Math Ser B Numer Anal*. 1:76–85.
- 23 Landau SM, Schumacher EH, Garavan H, Druzgal TJ, D’Esposito M. 2004. A functional MRI

- 1 study of the influence of practice on component processes of working memory.  
2 Neuroimage. 22:211–221.
- 3 Lee D, Rushworth MFS, Walton ME, Watanabe M, Sakagami M. 2007. Functional  
4 Specialization of the Primate Frontal Cortex during Decision Making. J Neurosci. 27:8170–  
5 8173.
- 6 Levy DJ, Glimcher PW. 2012. The root of all value: a neural common currency for choice. Curr  
7 Opin Neurobiol. 22:1027–1038.
- 8 Linden DEJ, Bittner RA, Muckli L, Waltz JA, Kriegeskorte N, Goebel R, Singer W, Munk MHJ.  
9 2003. Cortical capacity constraints for visual working memory: Dissociation of fMRI load  
10 effects in a fronto-parietal network. Neuroimage. 20:1518–1530.
- 11 Louie K, Glimcher PW. 2012. Efficient coding and the neural representation of value. Ann N Y  
12 Acad Sci. 1251:13–32.
- 13 Marois R, Ivanoff J. 2005. Capacity limits of information processing in the brain. Trends Cogn  
14 Sci. 9:296–305.
- 15 Milham MP, Banich MT, Claus ED, Cohen NJ. 2003. Practice-related effects demonstrate  
16 complementary roles of anterior cingulate and prefrontal cortices in attentional control.  
17 Neuroimage. 18:483–493.
- 18 Mitchell DJ, Cusack R. 2008. Flexible, Capacity-Limited Activity of Posterior Parietal Cortex in  
19 Perceptual as well as Visual Short-Term Memory Tasks. Cereb Cortex. 18:1788–1798.
- 20 Murai Y, Whitaker D, Yotsumoto Y. 2016. The centralized and distributed nature of adaptation-  
21 induced misjudgments of time Sensory adaptation and temporal adaptation: similarities and  
22 differences. Curr Opin Behav Sci. 8:117–123.
- 23 Nakahara H, Itoh H, Kawagoe R, Takikawa Y, Hikosaka O. 2004. Dopamine Neurons Can



- 1 Represent Context-Dependent Prediction Error. *Neuron*. 41:269–280.
- 2 Nieuwenhuis S, Heslenfeld DJ, von Geusau NJA, Mars RB, Holroyd CB, Yeung N. 2005.
- 3 Activity in human reward-sensitive brain areas is strongly context dependent. *Neuroimage*.
- 4 25:1302–1309.
- 5 Norman DA, Bobrow DG. 1975. On data-limited and resource-limited processes. *Cogn Psychol*.
- 6 7:44–64.
- 7 Otto AR, Vassena E. 2021. It's All Relative: Reward-Induced Cognitive Control Modulation
- 8 Depends on Context. *J Exp Psychol Gen*. 150:306–313.
- 9 Padoa-Schioppa C. 2009. Range-adapting representation of economic value in the orbitofrontal
- 10 cortex. *J Neurosci*. 29:14004–14014.
- 11 Padoa-Schioppa C, Assad JA. 2007. The representation of economic value in the orbitofrontal
- 12 cortex is invariant for changes of menu. *Nat Neurosci* 2008 11. 11:95–102.
- 13 Palminteri S, Khamassi M, Joffily M, Coricelli G. 2015. Contextual modulation of value signals
- 14 in reward and punishment learning. *Nat Commun* 2015 6. 6:1–14.
- 15 Pashler H. 1994. Dual-task interference in simple tasks: data and theory. *Psychol Bull*. 116:220–
- 16 244.
- 17 Raichle ME, Snyder AZ. 2007. A default mode of brain function: A brief history of an evolving
- 18 idea.
- 19 Shashidhara S, Mitchell DJ, Erez Y, Duncan J. 2019. Progressive recruitment of the
- 20 frontoparietal multiple-demand system with increased task complexity, time pressure, and
- 21 reward. *J Cogn Neurosci*. 31:1617–1630.
- 22 Sheahan H, Luyckx F, Nelli S, Teupe C, Summerfield C. 2021. Neural state space alignment for
- 23 magnitude generalization in humans and recurrent networks. *Neuron*. 109:1214-1226.e8.

- 1 Summerfield C, Luyckx F, Sheahan H. 2019. Structure learning and the posterior parietal cortex.
- 2 Todd JJ, Marois R. 2004. Capacity limit of visual short-term memory in human posterior parietal
- 3 cortex. *Nature*. 428:751–754.
- 4 Tustison NJ, Avants BB, Cook PA, Zheng Y, Egan A, Yushkevich PA, Gee JC. 2010. N4ITK:
- 5 Improved N3 bias correction. *IEEE Trans Med Imaging*. 29:1310–1320.
- 6 Tversky A, Simonson I. 1993. Context-dependent preferences. *Manage Sci*. 39:1179–1189.
- 7 Vassena E, Silvetti M, Boehler CN, Achten E, Fias W, Verguts T. 2014. Overlapping Neural
- 8 Systems Represent Cognitive Effort and Reward Anticipation. *PLoS One*. 9:e91008.
- 9 Walker JT, Irion AL, Gordon DG. 1981. Simple and contingent aftereffects of perceived
- 10 duration in vision and audition. *Percept Psychophys* 1981 295. 29:475–486.
- 11 Watanabe K, Funahashi S. 2014. Neural mechanisms of dual-task interference and cognitive
- 12 capacity limitation in the prefrontal cortex. *Nat Neurosci* 2014 174. 17:601–611.
- 13 Wen T, Duncan J, Mitchell DJ. 2020. Hierarchical representation of multistep tasks in multiple-
- 14 demand and default mode networks. *J Neurosci*. 40:7724–7738.
- 15 Wen T, Mitchell DJ, Duncan J. 2018. Response of the multiple-demand network during simple
- 16 stimulus discriminations. *Neuroimage*. 177:79–87.
- 17 Westbrook A, Lamichhane B, Braver T. 2019. The subjective value of cognitive effort is
- 18 encoded by a domain-general valuation network. *J Neurosci*. 39:3934–3947.
- 19 Wu R, Ferguson AM, Inzlicht M. 2021. Do humans prefer cognitive effort over doing nothing?
- 20 *psyArXiv*.
- 21 Zhang Y, Brady M, Smith S. 2001. Segmentation of brain MR images through a hidden Markov
- 22 random field model and the expectation-maximization algorithm. *IEEE Trans Med Imaging*.
- 23 20:45–57.
